# Supplementary material for: Biological effects of apatite nanoparticle-constructed ceramic surfaces in regulating behaviours of mesenchymal stem cells
Source: Royal Society of Chemistry journal article supplement (doi:10.1039/c8tb01638k), 2018-01-01
Supplement: c8tb01638k1.pdf [file c8tb01638k1.pdf]

## Electronic Supplementary Information

### Biological effects of apatite nanoparticle-constructed ceramic surfaces in regulating behaviours of mesenchymal stem cells

Changchun Zhou,<sup>a</sup> Yi Jiang,<sup>b</sup> Zhihui Sun,<sup>c</sup> Yanyan Li,<sup>c</sup> Bo Guo<sup>d</sup> and Youliang Hong<sup>a\*</sup>

<sup>a</sup> National Engineering Research Center for Biomaterials, Sichuan University, Chengdu, 610064, P. R. China

<sup>b</sup> The Second Hospital, Jilin University, Changchun 130012, P. R. China

<sup>c</sup> Department of Pharmacy of the First Hospital, Jilin University, Changchun 130012, P. R. China

<sup>d</sup> Department of Ophthalmology, West China Hospital, Sichuan University, Chengdu, 610064, P. R. China

\* Corresponding author. E-mail: [hyl@scu.edu.cn](mailto:hyl@scu.edu.cn) (Y. Hong)

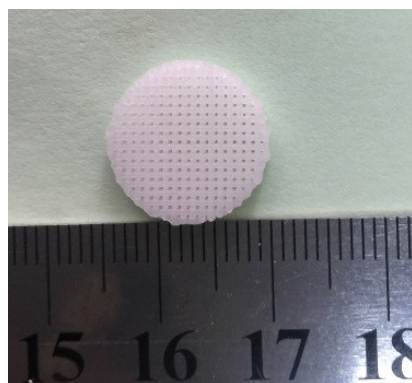

Figure S1. 3D printed PLLA scaffolds.

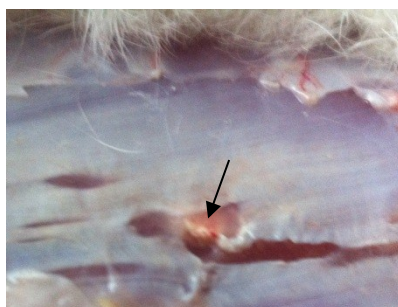

Figure S2. The porous CaP ceramic was implanted into the dorsal muscle of rabbit.

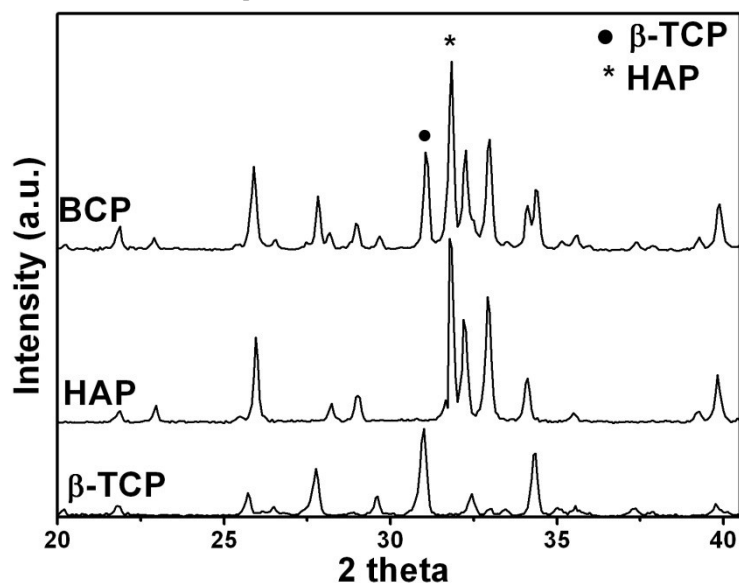

Figure S3. XRD patterns of three kinds of sintered porous ceramics.

**Table S1.** The primers used for PCR analyses.

| symbol                            | Accession No.  |         | primers                          |
|-----------------------------------|----------------|---------|----------------------------------|
| GAPDH                             | NM-008084      | Forward | 5'-CTCAACTACATGGTCTACATGTTCCA-3' |
|                                   |                | Reverse | 5'-CCCATTCTCGGCCTTGACT-3'        |
| osteocalcin                       | NM_007541      | Forward | 5'-GGCCCTGAGTCTGACAAAGC-3'       |
|                                   |                | Reverse | 5'-GCCGGAGTCTGTTCACCTT-3'        |
| alkaline phosphatase              | AY054302       | Forward | 5'-CCAGGGCTGCAAGGACAT-3'         |
|                                   |                | Reverse | 5'-GGCCGCCACCCATGAT- 3'          |
| Bone morphogenetic protein 2      | NM_007553      | Forward | 5'-CCTGCAGCAGCCAACTTGA-3'        |
|                                   |                | Reverse | 5'-CCACTGACTTGTGTTCTGATTCACT-3'  |
| core binding factor $\alpha$ 1    | NM_001145920   | Forward | 5'-CTCAGTGATTAGGGCGCATTC-3'      |
|                                   |                | Reverse | 5'-GGAGGGCCGTGGGTCT-3'           |
| osteopontin                       | D11411.1       | Forward | 5'-GCGCACGAATCCTCTGGGACTGGAC-3'  |
|                                   |                | Reverse | 5'-CGCGTGCTTAGGAGACCCTGACCTG-3'  |
| Transforming growth factor beta-1 | XM_008249704.1 | Forward | 5'-CTCCGGGCGAGGCCTCGGGGGAGGT-3'  |
|                                   |                | Reverse | 5'-GGCATTGTGGCTCGTGTAAG-3'       |
| Pax-1                             | XM_008256391.1 | Forward | 5'-CGTGCCCTACAACCACAT-3'         |
|                                   |                | Reverse | 5'-CGTGAGCCAGTCGTTGTAGG-3'       |
